# Supplementary material for: Combined Targeting of NAD Biosynthesis and the NAD-dependent Transcription Factor C-terminal Binding Protein as a Promising Novel Therapy for Pancreatic Cancer
Source: Oxford University Press journal article supplement (doi:10.1158/2767-9764.crc-22-0521), 2023-09-14
Supplement: crc-22-0521-s11.pdf [file crc-22-0521-s11.pdf]

| Cell name  | KRAS      | TP53      | Gender | Tissue Origin          |
|------------|-----------|-----------|--------|------------------------|
| PaTu8988T  | G12V      | R282W     | Female | Primary Tumor          |
| Suit2      | G12D      | R273H     | Male   | Metastatic Site: Liver |
| Panc-1     | G12D      | R273H     | Male   | Primary Tumor          |
| MiaPaCa-2  | G12C      | R248W     | Male   | Primary Tumor          |
| AsPc-1     | G12D      | C35Afs*35 | Female | Ascites                |
| BxPC3      | Wild-type | Y220C     | Female | Primary Tumor          |
| hTERT-HPNE | Wild-Type | Wild-Type | Male   | Pancreas duct          |

**Supp. Table 1.** *KRAS* / *TP53* status, sex and tissue origin for cell lines used in the study.
